# Supplementary material for: Investigations on a series of novel ionic liquids containing the [closo-B12Cl12]2− dianion
Source: Royal Society of Chemistry journal article supplement (doi:10.1039/c2ra21700g), 2012-01-01
Supplement: c2ra21700g.pdf [file c2ra21700g.pdf]

# Electronic Supplementary Information

## Investigations on a Series of Novel Ionic Liquids

### Containing the [*closo*-B<sub>12</sub>Cl<sub>12</sub>]<sup>2-</sup> Dianion

Na Zhou,<sup>a,b</sup> Guoying Zhao\*<sup>b</sup> Kun Dong,<sup>b</sup> Jian Sun<sup>b</sup> and Huawu Shao\*<sup>a</sup>

<sup>a</sup> Natural Products Research Center, Chengdu Institute of Biology,  
Chinese Academy of Sciences, Chengdu 610041, PR China.

E-mail: [shaohw@cib.ac.cn](mailto:shaohw@cib.ac.cn)

<sup>b</sup> Beijing Key Laboratory of Ionic Liquids Clean Process, Institute of  
Process Engineering, Chinese Academy of Sciences, Beijing 100190,

PR China. E-mail: [gyzhao@home.ipe.ac.cn](mailto:gyzhao@home.ipe.ac.cn)

## 1. Preparation of $\text{Cs}_2[\text{B}_{12}\text{Cl}_{12}]^{1,2}$

### (1) Preparation of $[\text{NEt}_3\text{H}]_2[\text{B}_{12}\text{H}_{12}]$

$\text{Na}[\text{BH}_4]$  (0.26 mol) in diglyme (40 mL) was charged into a 250 mL three-necked round bottom flask equipped with a 50 mL dropping funnel which should reach under the surface of the reaction mixture, with a pressure equalizing sidearm, a reflux condenser and a bubbler containing silicon oil. Iodine (0.081 mol) was dissolved in 35 mL diglyme and added to the dropping funnel. The entire apparatus was flushed with dry argon. The suspension of  $\text{Na}[\text{BH}_4]$  in diglyme was vigorously stirred and heated until the temperature rose to 100 °C. Then iodine was added drop-wise over a period of 30 min. During the addition, the amount of insoluble  $\text{Na}[\text{BH}_4]$  decreased and at the end a yellow color of the reaction mixture was observed. The dropping funnel was disassembled and the reaction mixture was continuously stirred over night at 100 °C under an atmosphere of argon to complete the formation of  $\text{Na}[\text{B}_3\text{H}_8]$ . On the next day the temperature was increased and the reaction mixture was refluxed (temperature of the oil bath was 185 °C) over night (16 h) under an atmosphere of dry argon to completely disproportionate  $\text{Na}[\text{B}_3\text{H}_8]$  to  $\text{Na}_2[\text{B}_{12}\text{H}_{12}]$  (by-product:  $\text{Na}[\text{BH}_4]$ ). Eventually the reaction mixture was cooled down to the room temperature and the diglyme was distilled off under dynamic vacuum at 140 °C. A large amount of white solid ( $\text{Na}_2[\text{B}_{12}\text{H}_{12}]$ ,  $\text{Na}[\text{BH}_4]$ ,  $\text{NaI}$ ) remained. The white solid was dissolved in 60 mL of water, 28 mL of concentrated hydrochloric acid were added carefully to the water solution. The acidified clear solution was stored in a fridge (+6 °C) over night and colorless crystals (ca. 1.5 g) of boric acid were formed and removed by filtration. The filtrate was treated with 40 mL  $\text{Et}_3\text{N}$  (pH = 9-10) and readily a voluminous white solid precipitated. The cloudy solution was stirred over night (14 h) to complete the precipitation. The white solid (ca. 8 g) was collected by filtration. The solid obtained was suspended in water, heated and then

filtrated while still hot (50 and 60 °C) to remove the more soluble boric acid. The product was dried in vacuum to give  $[\text{NEt}_3\text{H}]_2[\text{B}_{12}\text{H}_{12}]$  as a white solid (yield: 51%).

### **(2) Preparation of $\text{Cs}_2[\text{B}_{12}\text{H}_{12}]$**

3 equivalents of CsOH was added to a solution of solid  $[\text{NEt}_3\text{H}]_2[\text{B}_{12}\text{H}_{12}]$  dissolved in water in a polypropylene beaker and it precipitates immediately to give  $\text{Cs}_2[\text{B}_{12}\text{H}_{12}]$  after the CsOH addition. (Typically about 100 mL water was used for 10 g  $[\text{NEt}_3\text{H}]_2[\text{B}_{12}\text{H}_{12}]$ ).

### **(3) Preparation of $\text{Cs}_2[\text{B}_{12}\text{Cl}_{12}]$**

$\text{Cs}_2[\text{B}_{12}\text{H}_{12}]$  used in this reaction was recrystallized from hot water and dried under vacuum at 80 °C for 8 h before use. MeCN was dried with  $\text{CaH}_2$ , distilled under Ar and stored over molecular sieves in an Ar-filled glovebox.  $\text{SO}_2\text{Cl}_2$  used in this reaction was fractionally distilled before use. To a suspension of  $\text{Cs}_2[\text{B}_{12}\text{H}_{12}]$  (0.25 mmol) in acetonitrile (3 mL) in a Schlenk flask was slowly added  $\text{SO}_2\text{Cl}_2$  (37 mmol) under Ar. The mixture was heated to reflux. After 24 h, all volatiles were removed under vacuum to give a white solid  $\text{Cs}_2[\text{B}_{12}\text{Cl}_{12}]$ .

- 1 V. Geis, K. Guttsche, C. Knapp, H. Scherer and R. Uzun, *Dalton Trans.*, 2009, 2687–2694.
- 2 W. X. Gu and O. V. Ozerov, *Inorg. Chem.*, 2011, **50**, 2726–272.

**Table S.1** Elemental analysis and electrospray ionization mass spectrometry

| Abbreviation                                                                          | Analysis found (calc.)(%) |                |                |                  | ESI-MS |        |
|---------------------------------------------------------------------------------------|---------------------------|----------------|----------------|------------------|--------|--------|
|                                                                                       | C                         | H              | N              | Cl               | Cation | Anion  |
| [Hmim] <sub>2</sub> [B <sub>12</sub> Cl <sub>12</sub> ]                               | (13.32)<br>13.91          | (1.96)<br>2.11 | (7.77)<br>7.64 | (58.97)<br>59.11 | —      | 277.37 |
| [C <sub>2</sub> mim] <sub>2</sub> [B <sub>12</sub> Cl <sub>12</sub> ]                 | (18.54)<br>18.92          | (2.85)<br>2.90 | (7.21)<br>7.15 | (54.72)<br>54.95 | 111.09 | 277.37 |
| [C <sub>3</sub> mim] <sub>2</sub> [B <sub>12</sub> Cl <sub>12</sub> ]                 | (20.86)<br>21.32          | (3.23)<br>3.39 | (6.95)<br>6.73 | (52.89)<br>52.15 | 125.10 | 277.37 |
| [C <sub>4</sub> mim] <sub>2</sub> [B <sub>12</sub> Cl <sub>12</sub> ]                 | (23.05)<br>23.52          | (3.63)<br>3.43 | (6.72)<br>6.56 | (51.03)<br>50.82 | 139.12 | 277.37 |
| [C <sub>8</sub> mim] <sub>2</sub> [B <sub>12</sub> Cl <sub>12</sub> ]                 | (30.48)<br>31.39          | (3.63)<br>3.97 | (6.72)<br>5.99 | (44.98)<br>45.29 | 195.18 | 277.37 |
| [C <sub>10</sub> mim] <sub>2</sub> [B <sub>12</sub> Cl <sub>12</sub> ]                | (33.57)<br>34.02          | (5.42)<br>5.57 | (5.59)<br>5.59 | (42.46)<br>42.36 | 223.21 | 277.37 |
| [Bnmim] <sub>2</sub> [B <sub>12</sub> Cl <sub>12</sub> ]                              | (31.48)<br>30.95          | (3.30)<br>2.97 | (6.12)<br>6.25 | (46.46)<br>46.68 | 173.10 | 277.37 |
| [C <sub>4</sub> C <sub>1</sub> mim] <sub>2</sub> [B <sub>12</sub> Cl <sub>12</sub> ]  | (25.09)<br>25.03          | (3.98)<br>3.99 | (6.50)<br>6.46 | (49.37)<br>49.25 | 153.14 | 277.37 |
| [HEmim] <sub>2</sub> [B <sub>12</sub> Cl <sub>12</sub> ]                              | (17.80)<br>18.25          | (2.74)<br>2.89 | (6.92)<br>6.87 | (52.55)<br>52.35 | 127.08 | 277.37 |
| [N <sub>2,2,2,4</sub> ] <sub>2</sub> [B <sub>12</sub> Cl <sub>12</sub> ]              | (27.55)<br>27.36          | (5.55)<br>5.65 | (3.21)<br>3.04 | (48.80)<br>49.05 | 158.18 | 277.37 |
| [N <sub>2,2,2,6</sub> ] <sub>2</sub> [B <sub>12</sub> Cl <sub>12</sub> ]              | (31.07)<br>30.69          | (6.08)<br>6.04 | (3.02)<br>2.71 | (45.85)<br>46.04 | 186.22 | 277.37 |
| [N <sub>1,1,1,6</sub> ] <sub>2</sub> [B <sub>12</sub> Cl <sub>12</sub> ] <sup>a</sup> | (40.60)<br>41.33          | (7.53)<br>7.46 | (2.49)<br>2.83 | (37.84)<br>37.79 | 284.32 | 277.37 |
| [N <sub>1,1,1,6</sub> ] <sub>2</sub> [B <sub>12</sub> Cl <sub>12</sub> ] <sup>b</sup> | (40.60)<br>41.01          | (7.53)<br>7.67 | (2.49)<br>2.08 | (37.84)<br>37.11 | 284.32 | 277.37 |
| [N <sub>2,2,2,HE</sub> ] <sub>2</sub> [B <sub>12</sub> Cl <sub>12</sub> ]             | (22.67)<br>22.64          | (4.76)<br>4.75 | (3.30)<br>3.23 | (50.19)<br>49.99 | 146.15 | 277.37 |
| [PyC <sub>4</sub> ] <sub>2</sub> [B <sub>12</sub> Cl <sub>12</sub> ]                  | (26.12)<br>26.48          | (3.41)<br>3.40 | (3.39)<br>3.40 | (51.40)<br>51.26 | 136.11 | 277.37 |
| [P <sub>PPP</sub> ] <sub>2</sub> [B <sub>12</sub> Cl <sub>12</sub> ]                  | (42.22)<br>42.47          | (3.54)<br>3.64 | —              | (37.39)<br>37.12 | 291.12 | 277.37 |

|                                                                       |         |        |   |         |        |        |
|-----------------------------------------------------------------------|---------|--------|---|---------|--------|--------|
| [P <sub>PPHE</sub> ] <sub>2</sub> [B <sub>12</sub> Cl <sub>12</sub> ] | (41.07) | (3.45) | — | (36.37) | 307.12 | 277.37 |
|                                                                       | 42.01   | 3.37   |   | 36.25   |        |        |

<sup>a</sup> The sample without any further treatment. <sup>b</sup> The sample prepared and further treated with water at the temperature of 60 °C.

**Table S.2** <sup>1</sup>H NMR chemical shifts (δppm, J/Hz) of the reported salts in DMSO-d<sub>6</sub>

| Imidazolium<br>[B <sub>12</sub> Cl <sub>12</sub> ]                                        | C(2)-<br>H | C(4)-H  | C(5)-H  | N-CH <sub>2</sub> - | N-<br>CH <sub>3</sub> | NCH <sub>2</sub> -<br>CH <sub>2</sub> | N(CH <sub>2</sub> ) <sub>2</sub> -<br>(CH <sub>2</sub> ) <sub>n-3</sub> - | N(CH <sub>2</sub> ) <sub>n-1</sub> -<br>CH <sub>3</sub> |
|-------------------------------------------------------------------------------------------|------------|---------|---------|---------------------|-----------------------|---------------------------------------|---------------------------------------------------------------------------|---------------------------------------------------------|
| [Hmim] <sub>2</sub> [B <sub>12</sub> Cl <sub>12</sub> ]                                   | 8.94(s)    | 7.65(m) | 7.60(m) | —<br>—              | 3.85(s)               | —                                     | —                                                                         | —<br>—                                                  |
| [C <sub>2</sub> mim] <sub>2</sub> [B <sub>12</sub> Cl <sub>12</sub> ]                     | 9.25(s)    | 7.81(m) | 7.72(m) | 4.21(q)<br>J=7.6Hz  | 3.86(s)               | —                                     | —                                                                         | 1.42(t)<br>J=6.8Hz                                      |
| [C <sub>3</sub> mim] <sub>2</sub> [B <sub>12</sub> Cl <sub>12</sub> ]                     | 9.09(s)    | 7.76(m) | 7.70(m) | 4.12(q)<br>J=7.1Hz  | 3.85(s)               | 1.79(m)                               | —                                                                         | 0.85(t)<br>J=7.4Hz                                      |
| [C <sub>4</sub> mim] <sub>2</sub> [B <sub>12</sub> Cl <sub>12</sub> ]                     | 9.17(s)    | 7.78(m) | 7.71(m) | 4.17(t)<br>J=6.8Hz  | 3.85(s)               | 1.77(m)                               | 1.26(m)                                                                   | 0.90(t)<br>J=7.6Hz                                      |
| [C <sub>8</sub> mim] <sub>2</sub> [B <sub>12</sub> Cl <sub>12</sub> ]                     | 9.14(s)    | 7.74(m) | 7.67(m) | 4.12(t)<br>J=6.8Hz  | 3.82(s)               | 1.75(m)                               | 1.22-1.20<br>(m)                                                          | 0.81(t)<br>J=6.9Hz                                      |
| [C <sub>10</sub> mim] <sub>2</sub> [B <sub>12</sub> Cl <sub>12</sub> ]                    | 9.10(s)    | 7.77(m) | 7.70(m) | 4.14(t)<br>J=7.6Hz  | 3.84(s)               | 1.76(m)                               | 1.27-1.24<br>(m)                                                          | 0.86(t)<br>J=6.9Hz                                      |
| [Bnmim] <sub>2</sub> [B <sub>12</sub> Cl <sub>12</sub> ]                                  | 9.27(s)    | 7.81(m) | 7.80(m) | 5.43(s)             | 3.86(s)               | —                                     | 7.42-7.43<br>(m)                                                          | —                                                       |
| [C <sub>4</sub> C <sub>1</sub> mim] <sub>2</sub> [B <sub>12</sub> Cl <sub>12</sub> ]<br>1 | —          | 7.65(m) | 7.62(m) | 4.11(t)<br>J=7.6Hz  | 3.75(s)               | 1.69(m)                               | 1.28(m)                                                                   | 0.91(t)<br>J=7.6Hz                                      |
| [HEmim] <sub>2</sub> [B <sub>12</sub> Cl <sub>12</sub> ]                                  | 9.09(s)    | 7.73(m) | 7.70(m) | 4.21(t)<br>J=5.5Hz  | 3.87(s)               | 3.71(m)                               | —                                                                         | (—OH)<br>5.18(s)                                        |

| <b>Ammonium</b><br>[B <sub>12</sub> Cl <sub>12</sub> ]                    | <b>N-CH<sub>2</sub></b>     | <b>N-CH<sub>2</sub>-</b><br><b>CH<sub>2</sub></b> | <b>N-(CH<sub>2</sub>)<sub>2</sub>-</b><br><b>(CH<sub>2</sub>)<sub>n-3</sub></b> | <b>N-(CH<sub>2</sub>)<sub>n-1</sub>-</b><br><b>CH<sub>3</sub></b> | <b>N-CH<sub>2</sub><sup>3</sup></b> | <b>N-CH<sub>3</sub><sup>3</sup></b> | <b>—OH</b> |
|---------------------------------------------------------------------------|-----------------------------|---------------------------------------------------|---------------------------------------------------------------------------------|-------------------------------------------------------------------|-------------------------------------|-------------------------------------|------------|
| [N <sub>2 2 2 4</sub> ] <sub>2</sub> [B <sub>12</sub> Cl <sub>12</sub> ]  | 3.11 (t)<br><i>J</i> =8.2Hz | 1.56(m)                                           | 1.33(m)                                                                         | 0.94(t)<br><i>J</i> =7.6Hz                                        | 3.23(q)<br><i>J</i> =7.6Hz          | 1.18(m)                             | —          |
| [N <sub>2 2 2 6</sub> ] <sub>2</sub> [B <sub>12</sub> Cl <sub>12</sub> ]  | 3.12(t)<br><i>J</i> =8.2Hz  | 1.57(m)                                           | 1.31-<br>1.30<br>(m)                                                            | 0.88(t)<br><i>J</i> =6.2Hz                                        | 3.24(q)<br><i>J</i> =7.6Hz          | 1.19(m)                             | —          |
| [N <sub>1 1 1 16</sub> ] <sub>2</sub> [B <sub>12</sub> Cl <sub>12</sub> ] | 3.25(t)<br><i>J</i> =8.3Hz  | 1.66(m)                                           | 1.29-<br>1.24<br>(m)                                                            | 0.86(t)<br><i>J</i> =6.2Hz                                        | —                                   | 3.03(s)                             | —          |
| [N <sub>2 2 2 HE</sub> ] <sub>2</sub> [B <sub>12</sub> Cl <sub>12</sub> ] | 3.30(m)                     | —                                                 | —                                                                               | 3.34(s)                                                           | 3.30(m)                             | 1.18(t)<br><i>J</i> =7.6Hz          | 5.26(s)    |

  

| <b>Phosphonium</b><br>[B <sub>12</sub> Cl <sub>12</sub> ]              | <b>P-CH<sub>2</sub></b>    | <b>P-CH<sub>2</sub>-</b><br><b>CH<sub>2</sub>-</b> | <b>P-(C<sub>6</sub>H<sub>5</sub>)-</b><br><b>o.m</b> | <b>P-(C<sub>6</sub>H<sub>5</sub>)-</b><br><b>p</b> | <b>—OH</b> |
|------------------------------------------------------------------------|----------------------------|----------------------------------------------------|------------------------------------------------------|----------------------------------------------------|------------|
| [P <sub>PPP2</sub> ] <sub>2</sub> [B <sub>12</sub> Cl <sub>12</sub> ]  | 3.62(m)<br><i>J</i> =7.6Hz | 1.23(m)<br><i>J</i> =7.6Hz                         | 7.79-7.78<br>(m)                                     | 7.80(m)                                            | —          |
| [P <sub>PPPHE</sub> ] <sub>2</sub> [B <sub>12</sub> Cl <sub>12</sub> ] | 3.78(m)                    | 3.78(m)                                            | 7.78-7.75<br>(m)                                     | 7.80(m)                                            | 5.44(s)    |

  

| <b>Pyridinium</b><br>[B <sub>12</sub> Cl <sub>12</sub> ]             | <b>C(2)-H</b>              | <b>C(3)-H</b>              | <b>C(4)-H</b>              | <b>N-CH<sub>2</sub></b>    | <b>NCH<sub>2</sub>-</b><br><b>CH<sub>2</sub></b> | <b>N(CH<sub>2</sub>)<sub>2</sub>-</b><br><b>(CH<sub>2</sub>)<sub>n-3</sub></b> | <b>N-(CH<sub>2</sub>)<sub>n-1</sub>-</b><br><b>CH<sub>3</sub></b> |
|----------------------------------------------------------------------|----------------------------|----------------------------|----------------------------|----------------------------|--------------------------------------------------|--------------------------------------------------------------------------------|-------------------------------------------------------------------|
| [PyC <sub>4</sub> ] <sub>2</sub> [B <sub>12</sub> Cl <sub>12</sub> ] | 9.10(d)<br><i>J</i> =5.5Hz | 8.17(t)<br><i>J</i> =6.8Hz | 8.61(t)<br><i>J</i> =7.6Hz | 4.61(t)<br><i>J</i> =7.6Hz | 1.90(q)                                          | 1.29(m)                                                                        | 0.92(t)<br><i>J</i> =7.6Hz                                        |

**Table S.3** Melting points of the mixture including [N<sub>11116</sub>]<sub>2</sub>[B<sub>12</sub>Cl<sub>12</sub>] (1) and [C<sub>4</sub>mim]Cl (2) are detected, as a function of various quality ratios.

| Quality Ratio (m1:m2) | Melting Point (T <sub>m</sub> /°C) |
|-----------------------|------------------------------------|
| 1:0                   | 104                                |
| 3:1                   | 93                                 |
| 1:1                   | 69                                 |
| 1:3                   | 31                                 |
| 0:1                   | 41                                 |

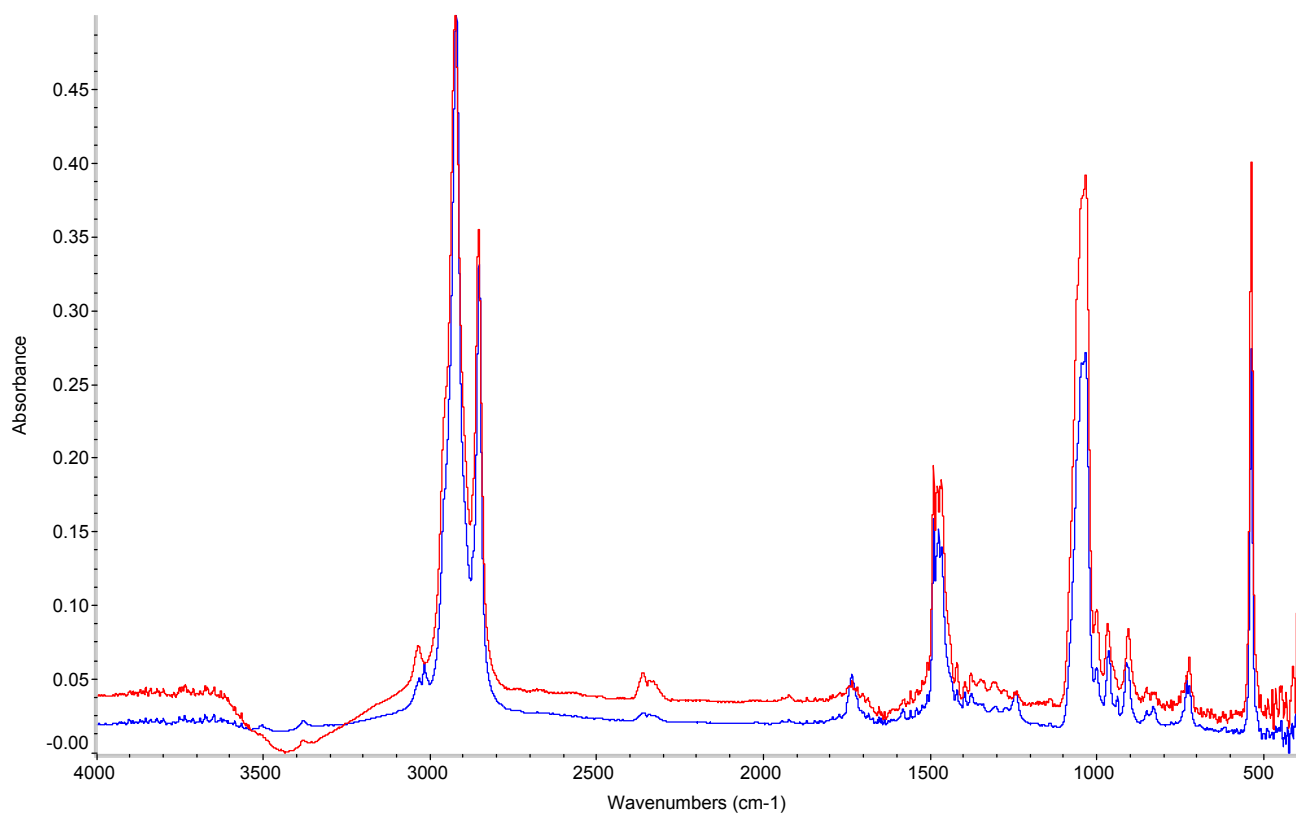

**Fig. S.1** FT-IR spectrum of  $[N_{11116}]_2[B_{12}Cl_{12}]$  where the red spectrum represents sample treated with water at the temperature of 60 °C while the blue spectrum represents the one without any treatment.



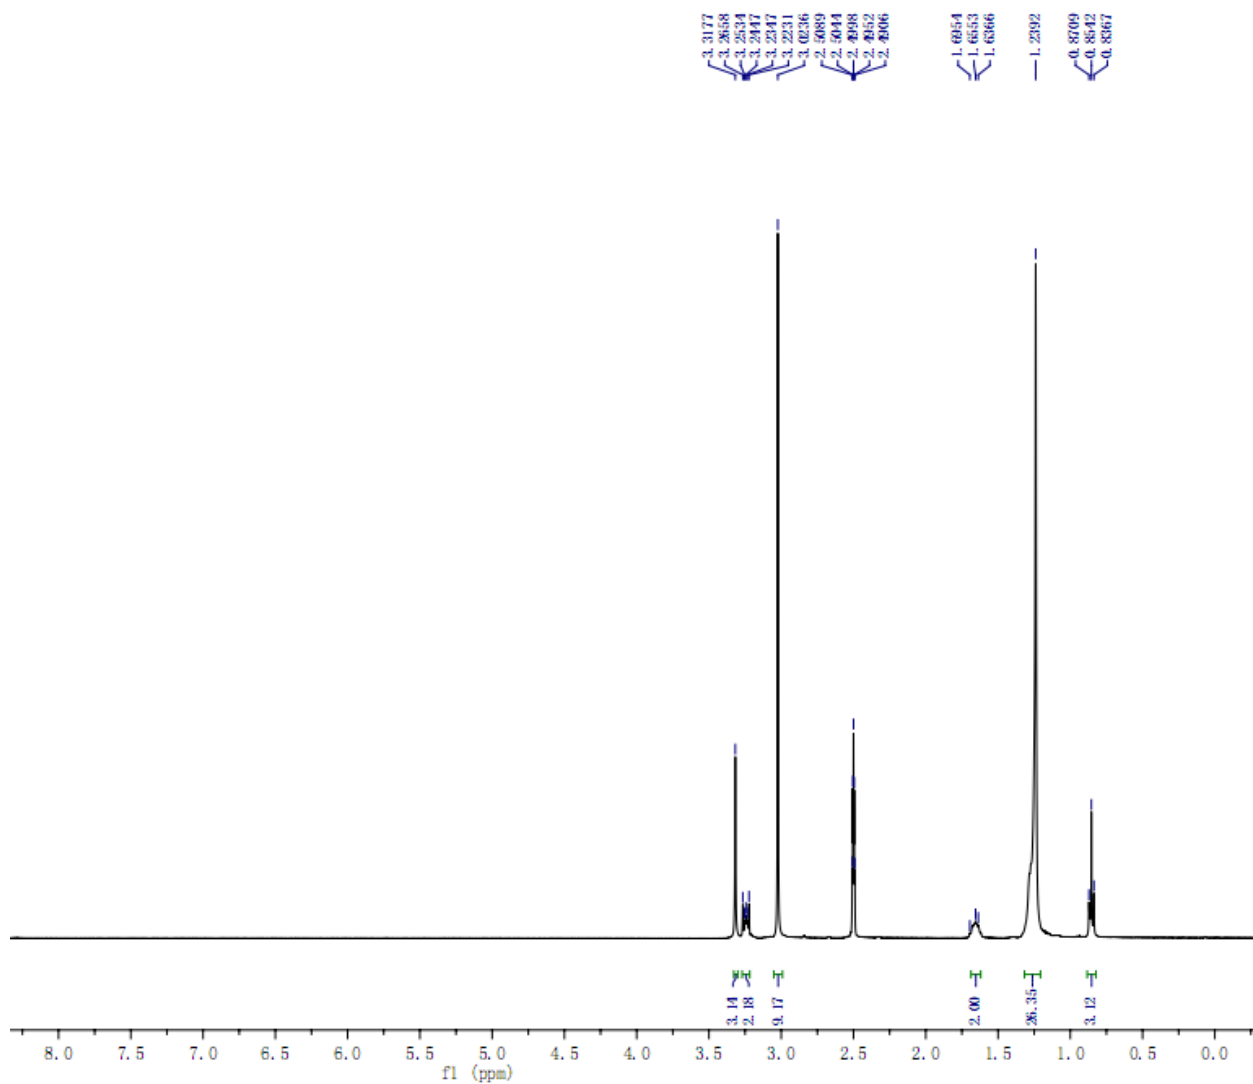

(a)

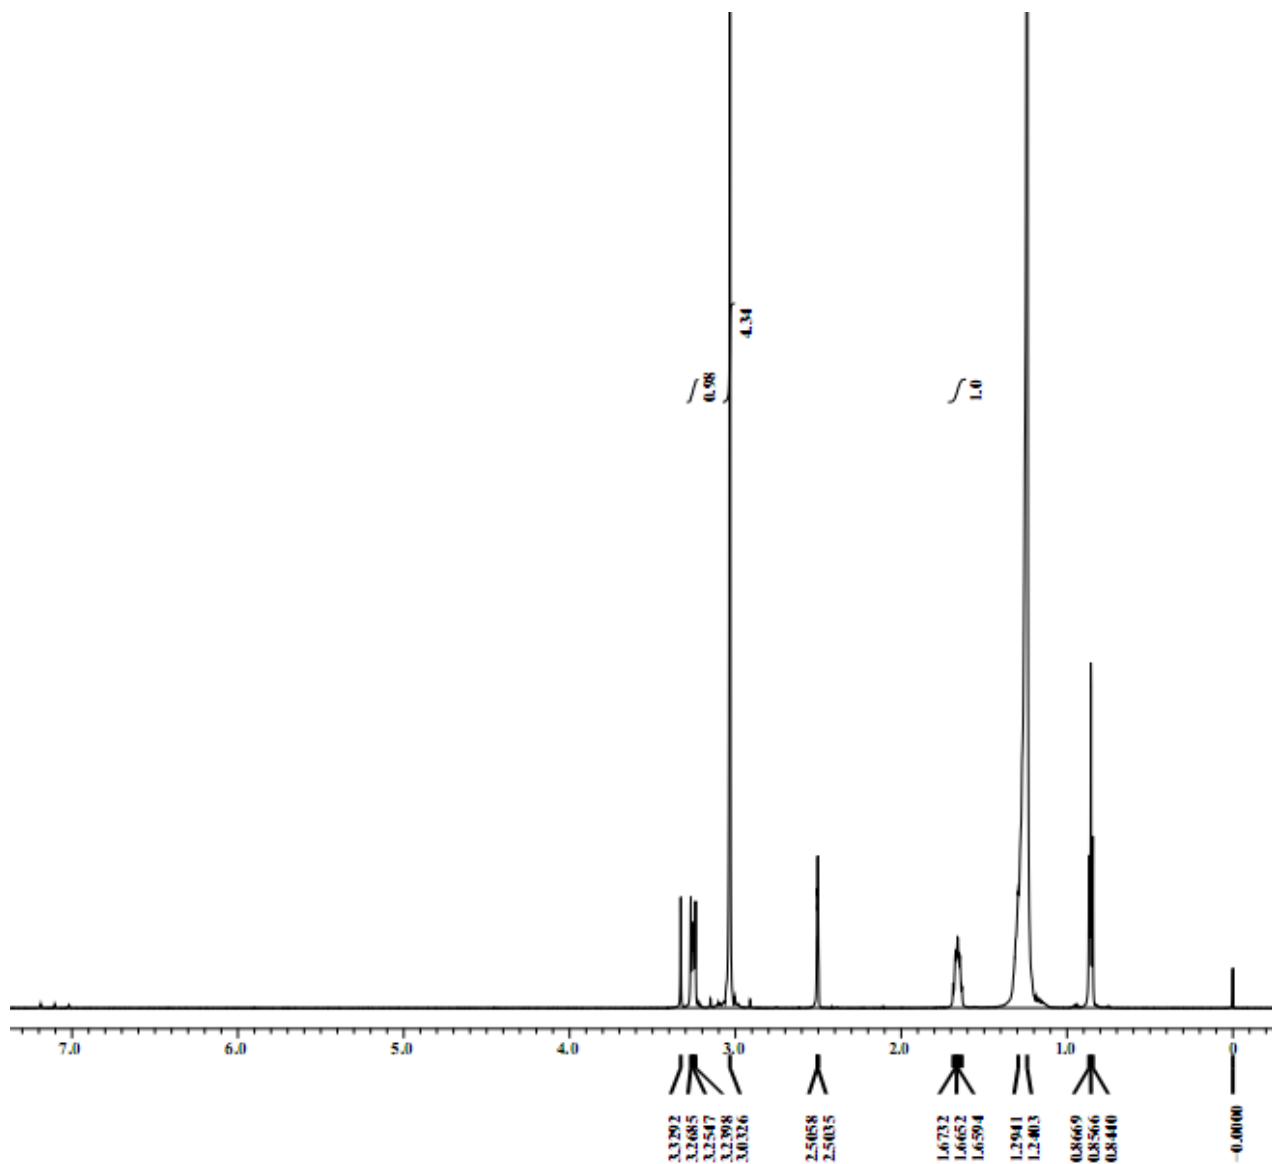

(b)

**Fig. S.2** <sup>1</sup>H NMR spectrum of [N<sub>11116</sub>]<sub>2</sub>[B<sub>12</sub>Cl<sub>12</sub>] in DMSO-d<sub>6</sub> where the former spectrum (a) represents sample treated with water at the temperature of 60 °C while the latter spectrum (b) represents the one without any treatment.

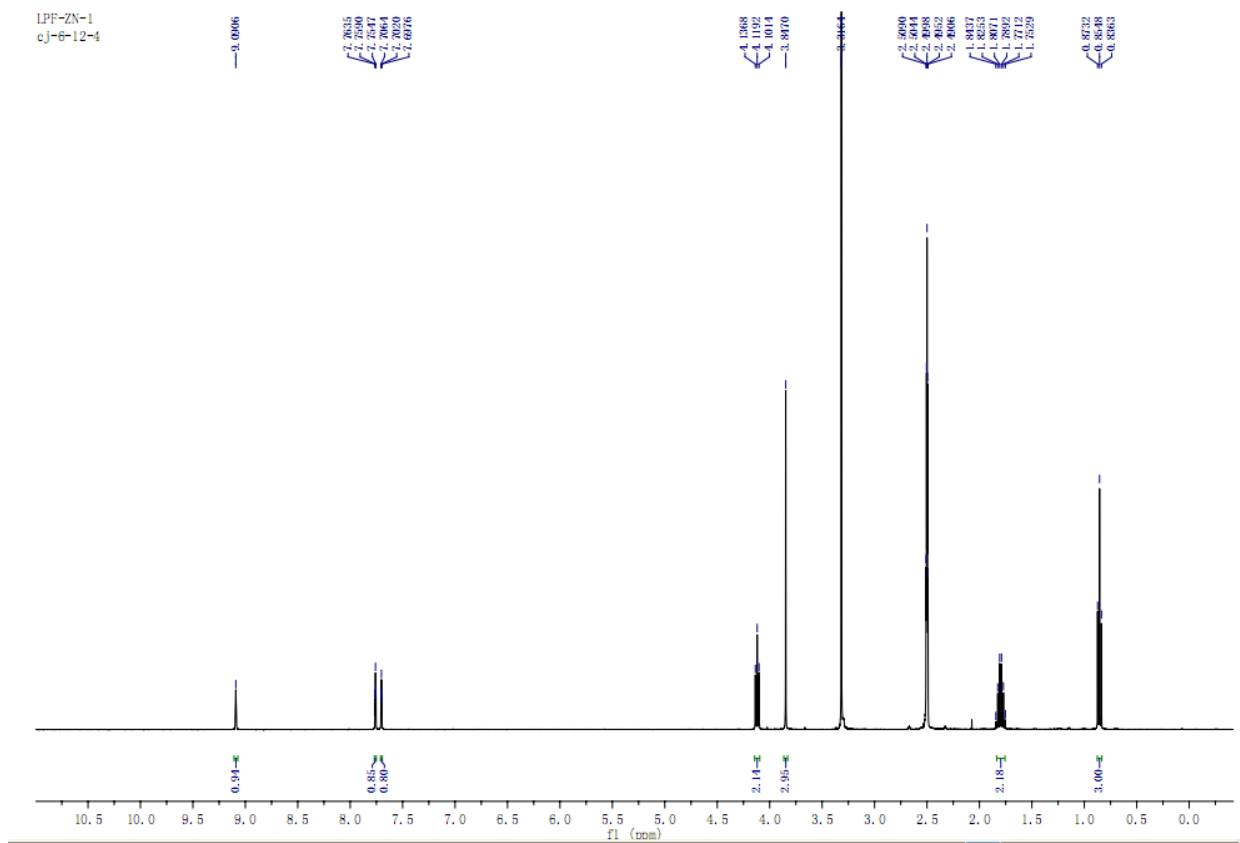

**Fig. S.3**  $^1\text{H}$  NMR spectrum of  $[\text{C}_3\text{mim}]_2[\text{B}_{12}\text{Cl}_{12}]$  in  $\text{DMSO-d}_6$ .

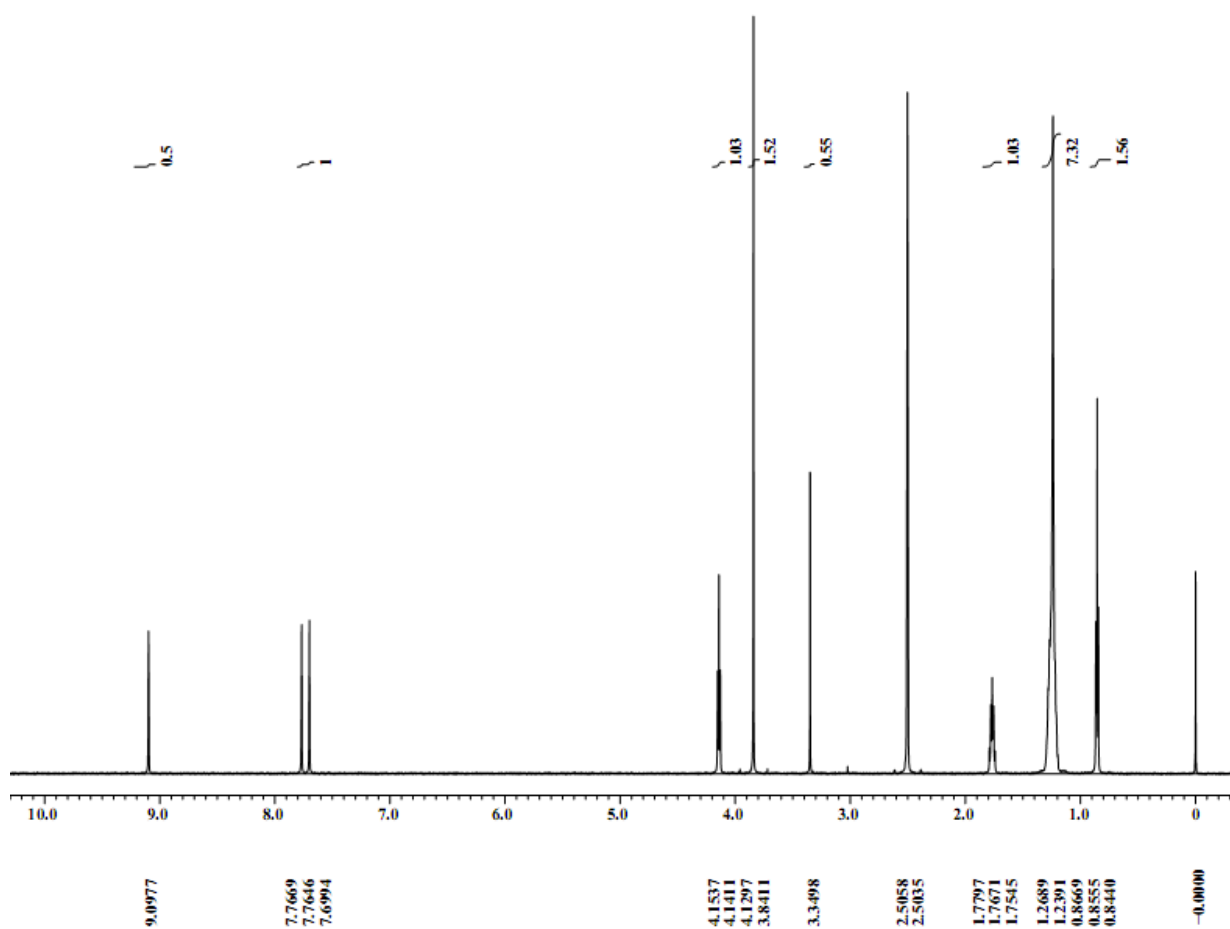

**Fig. S.4**  $^1\text{H}$  NMR spectrum of  $[\text{C}_{10}\text{mim}]_2[\text{B}_{12}\text{Cl}_{12}]$  in  $\text{DMSO-d}_6$ .

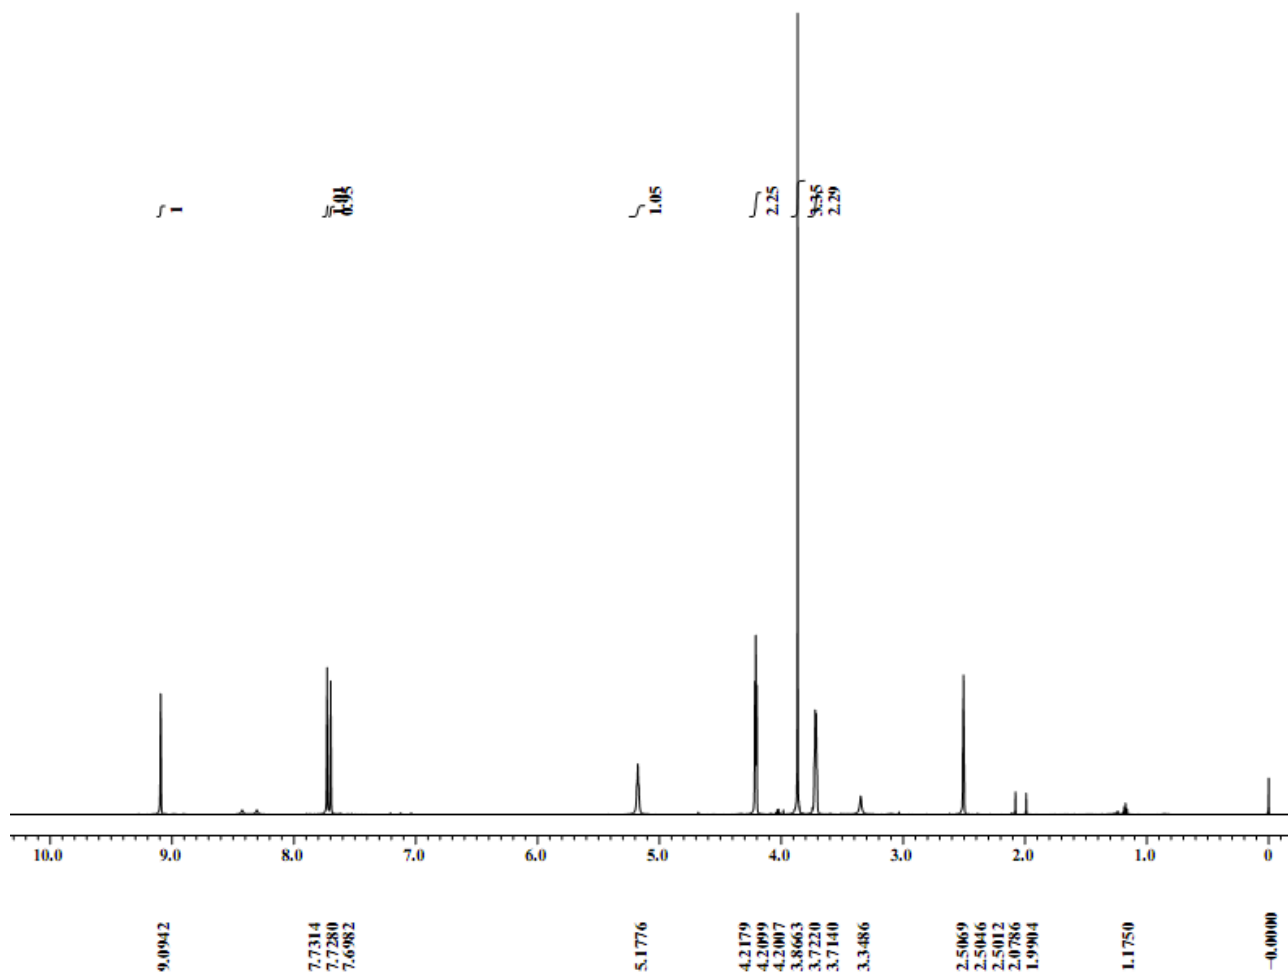

**Fig. S.5** <sup>1</sup>H NMR spectrum of [HEmim]<sub>2</sub>[B<sub>12</sub>Cl<sub>12</sub>] in DMSO-d<sub>6</sub>.

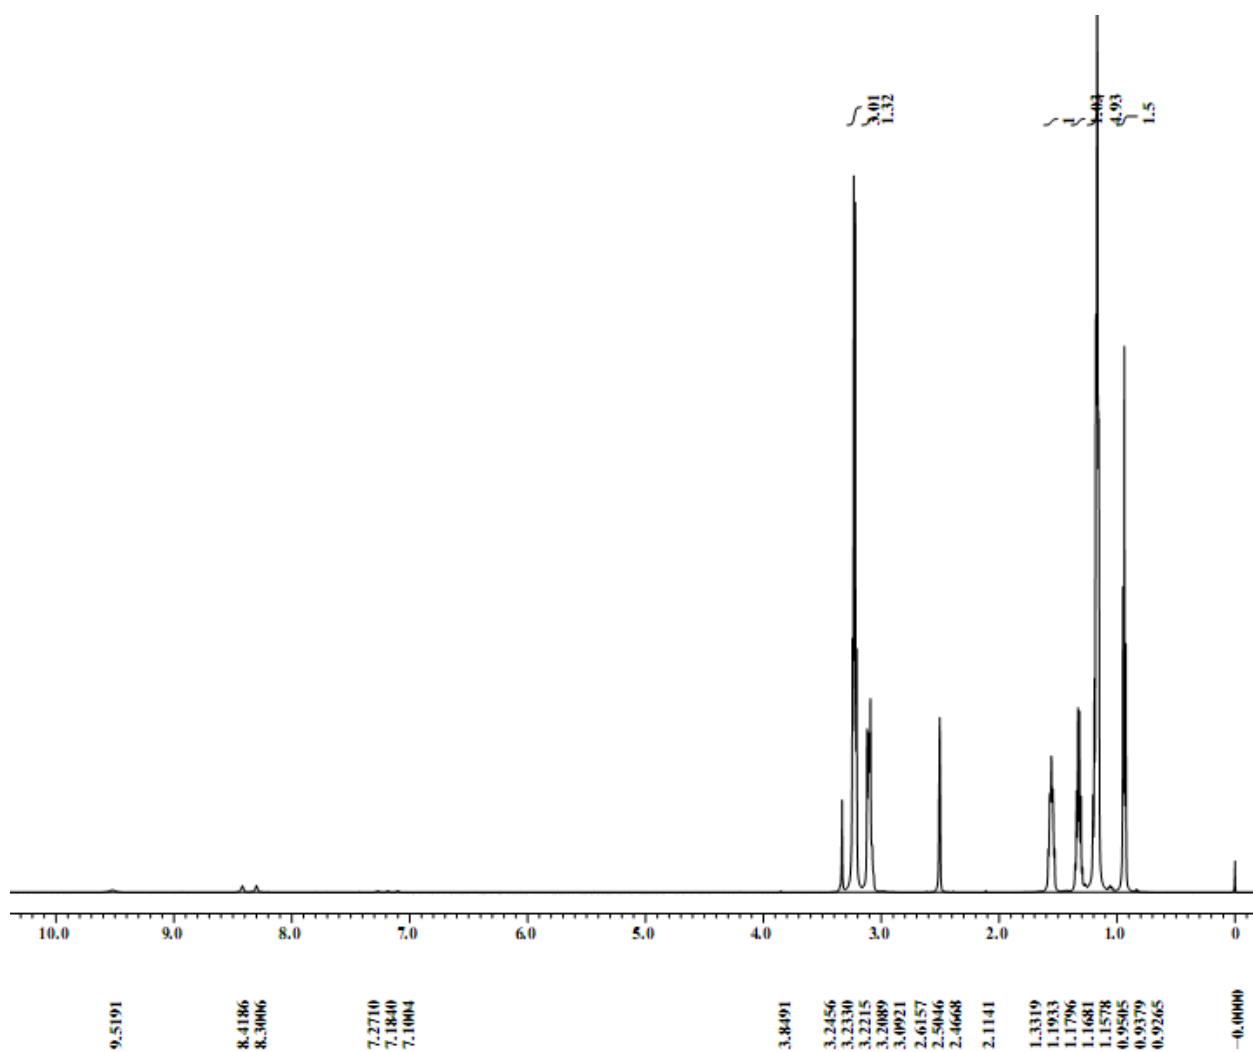

**Fig. S.6**  $^1\text{H}$  NMR spectrum of  $[\text{N}_{2.2.2.4}]_2[\text{B}_{12}\text{Cl}_{12}]$  in  $\text{DMSO-d}_6$ .

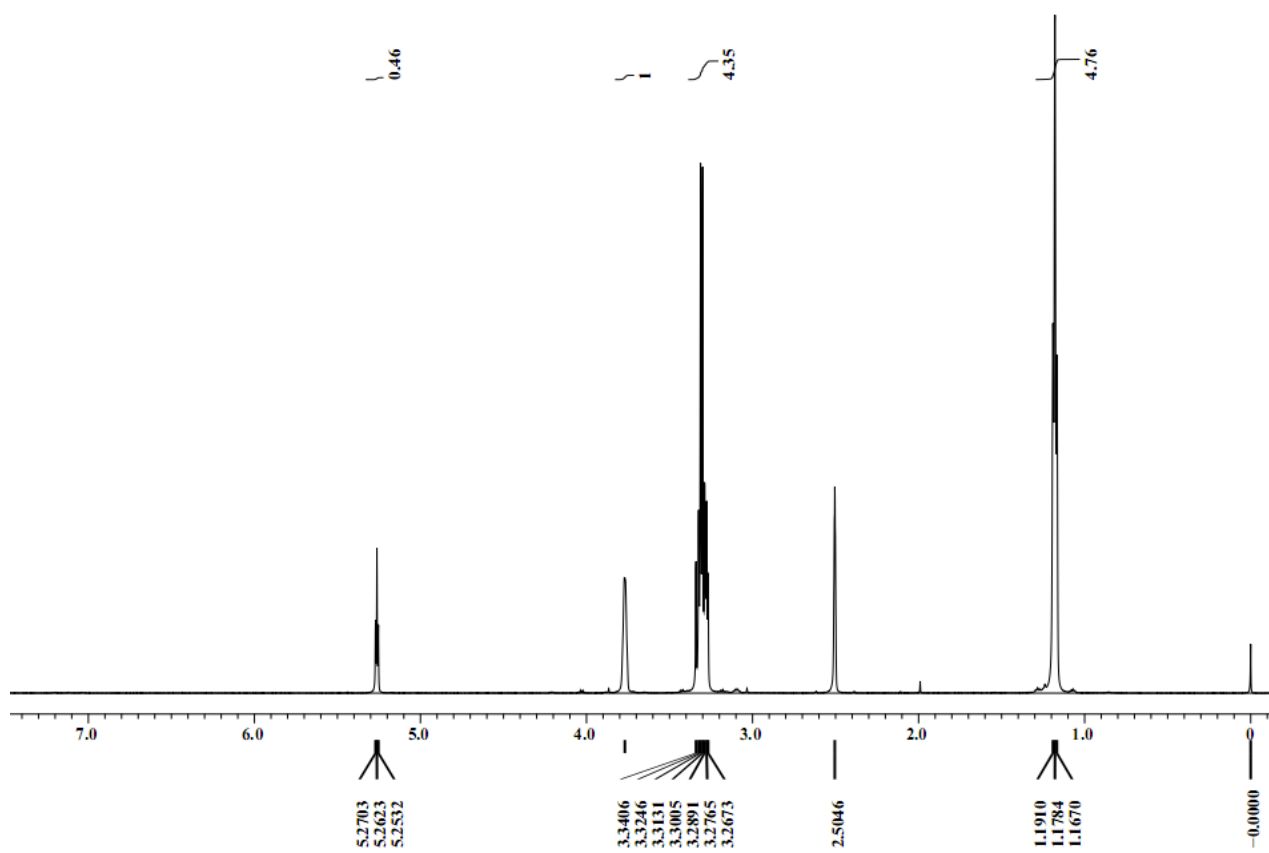

**Fig. S.7**  $^1\text{H}$  NMR spectrum of  $[\text{N}_{2.2.2}\text{HE}]_2[\text{B}_{12}\text{Cl}_{12}]$  in  $\text{DMSO-d}_6$ .

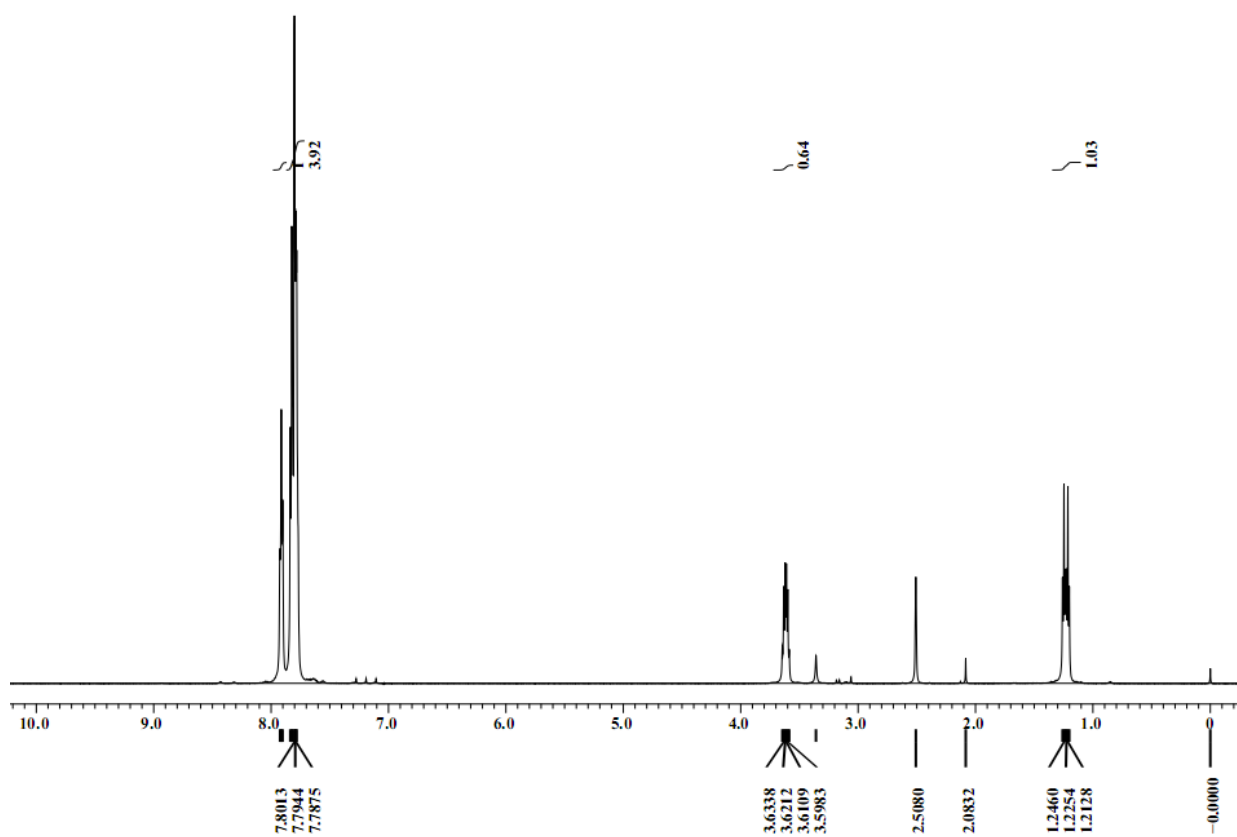

**Fig. S.8**  $^1\text{H}$  NMR spectrum of  $[\text{P}_{\text{P P P 2}}]_2[\text{B}_{12}\text{Cl}_{12}]$  in  $\text{DMSO-d}_6$ .



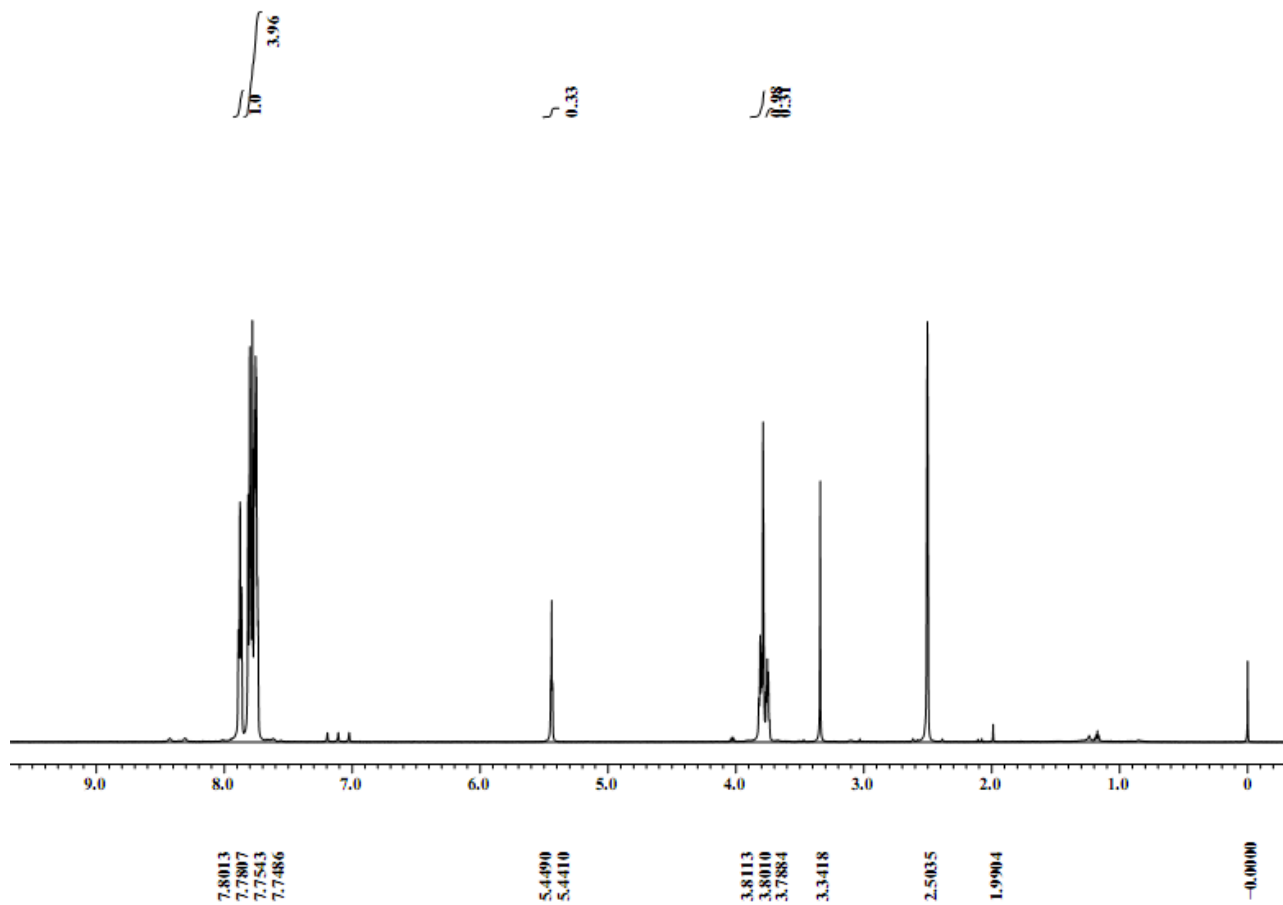

**Fig. S.9**  $^1\text{H}$  NMR spectrum of  $[\text{P}_\text{P}_\text{P}_\text{H}_\text{E}]_2[\text{B}_{12}\text{Cl}_{12}]$  in  $\text{DMSO-d}_6$ .

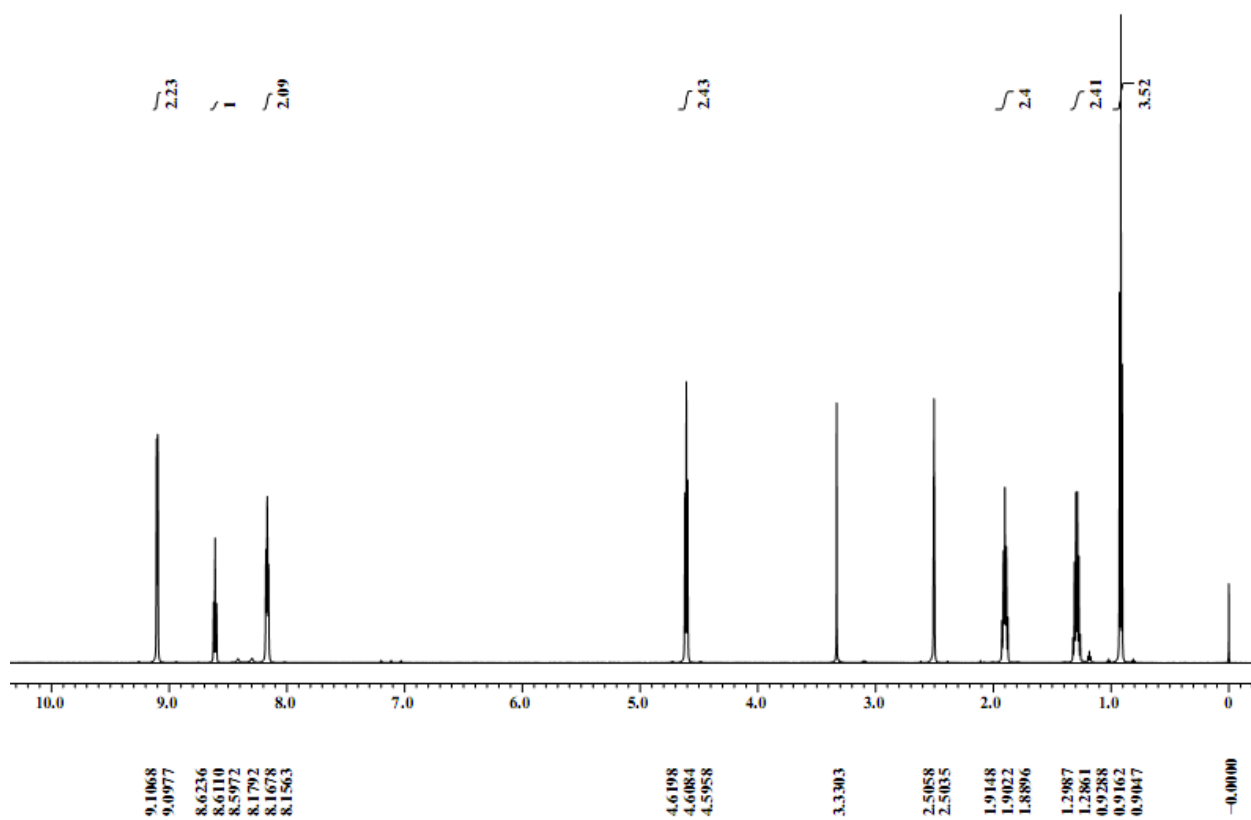

**Fig. S.10** <sup>1</sup>H NMR spectrum of [PyC<sub>4</sub>]<sub>2</sub>[B<sub>12</sub>Cl<sub>12</sub>] in DMSO-d<sub>6</sub>.

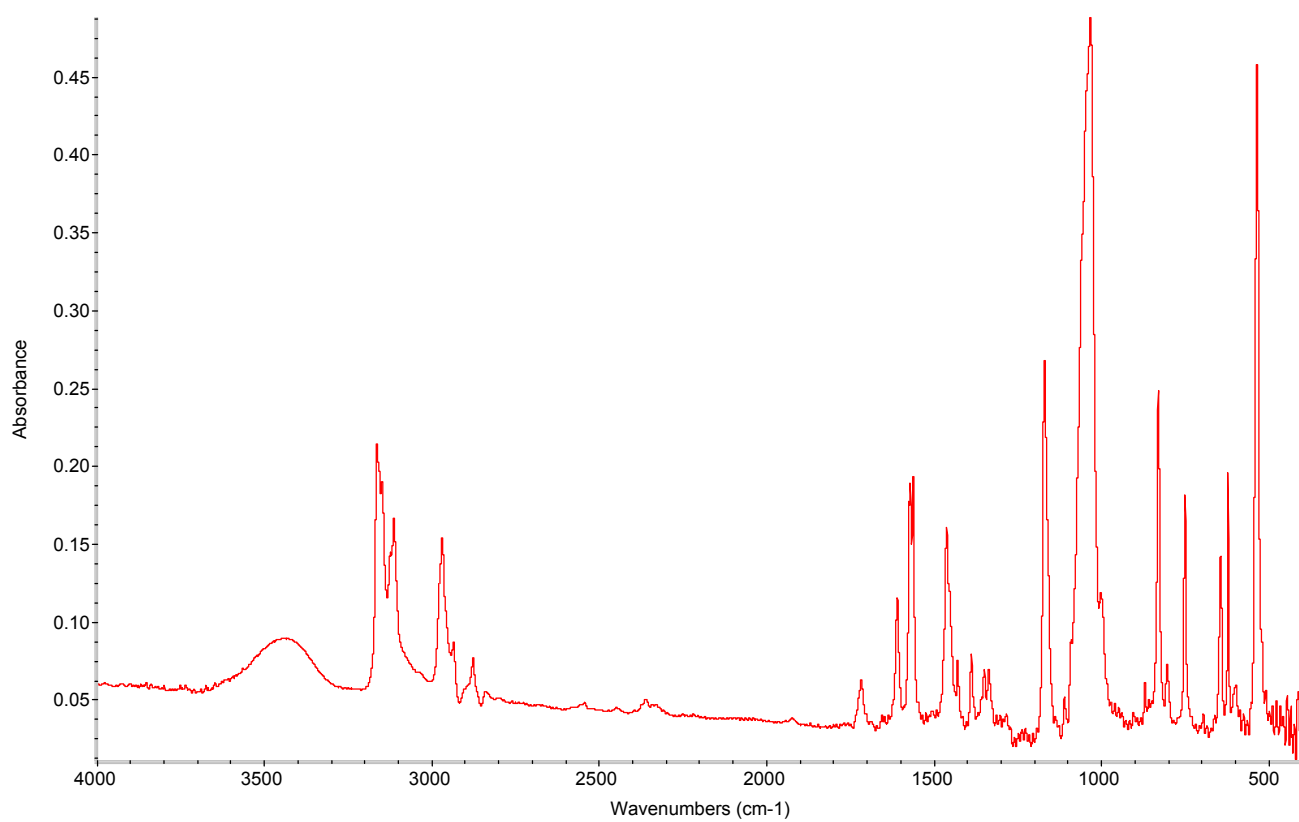

**Fig. S.11** FT-IR spectrum of [C<sub>3</sub>mim]<sub>2</sub>[B<sub>12</sub>Cl<sub>12</sub>].

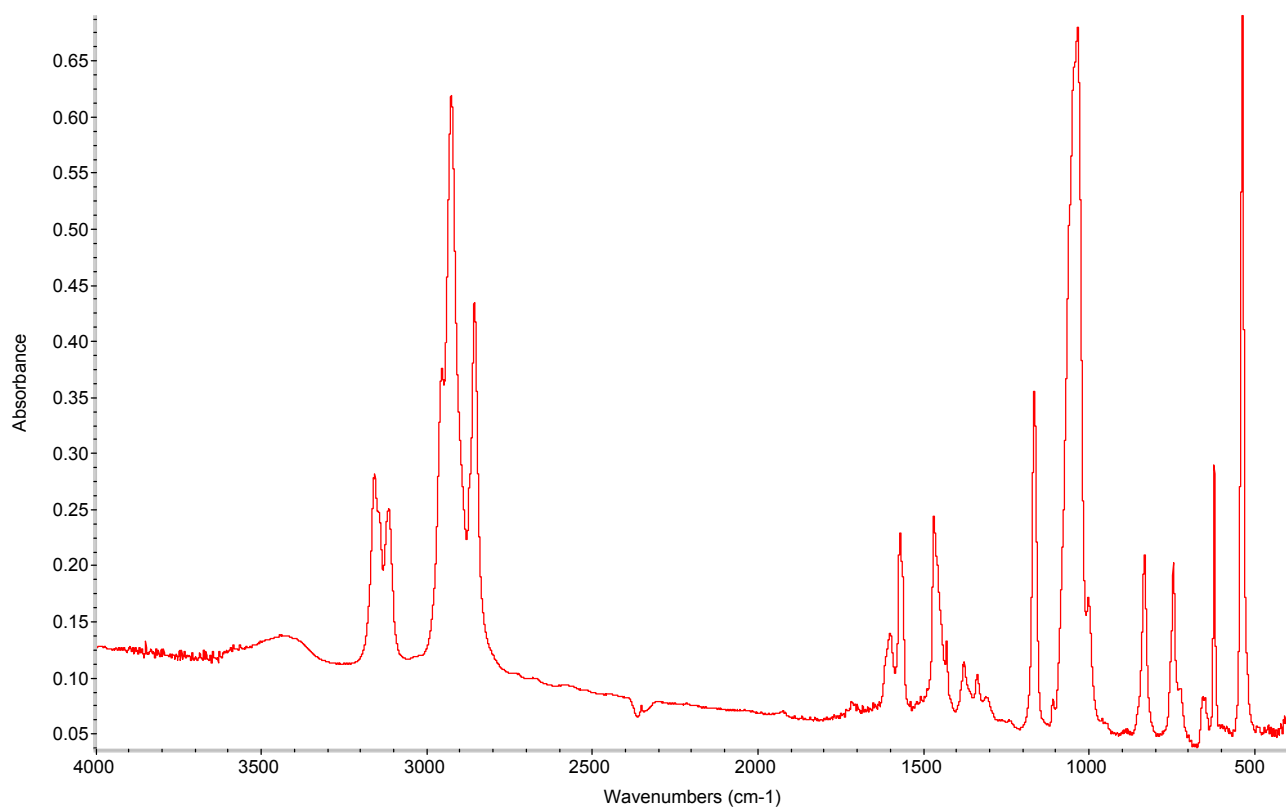

**Fig. S.12** FT-IR spectrum of [C<sub>10</sub>mim]<sub>2</sub>[B<sub>12</sub>Cl<sub>12</sub>].

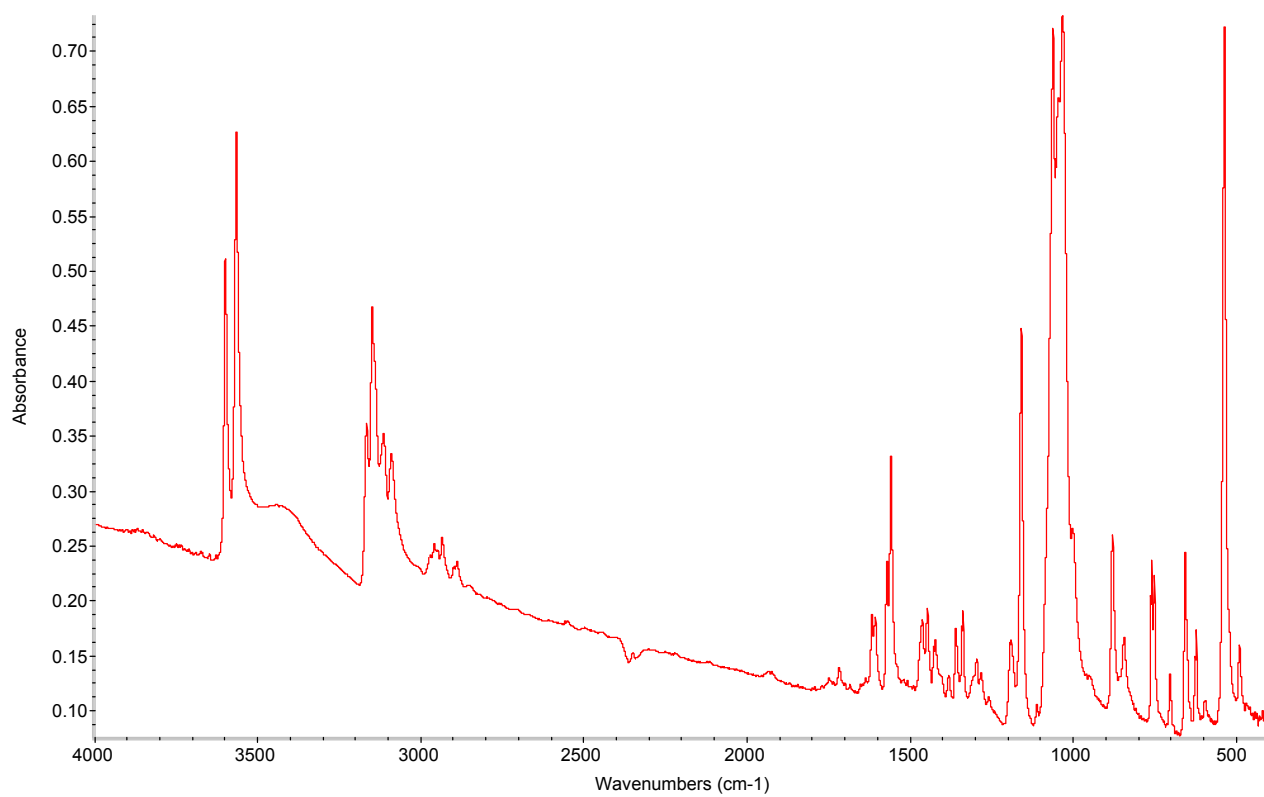

**Fig. S.13** FT-IR spectrum of [HEmim]<sub>2</sub>[B<sub>12</sub>Cl<sub>12</sub>].

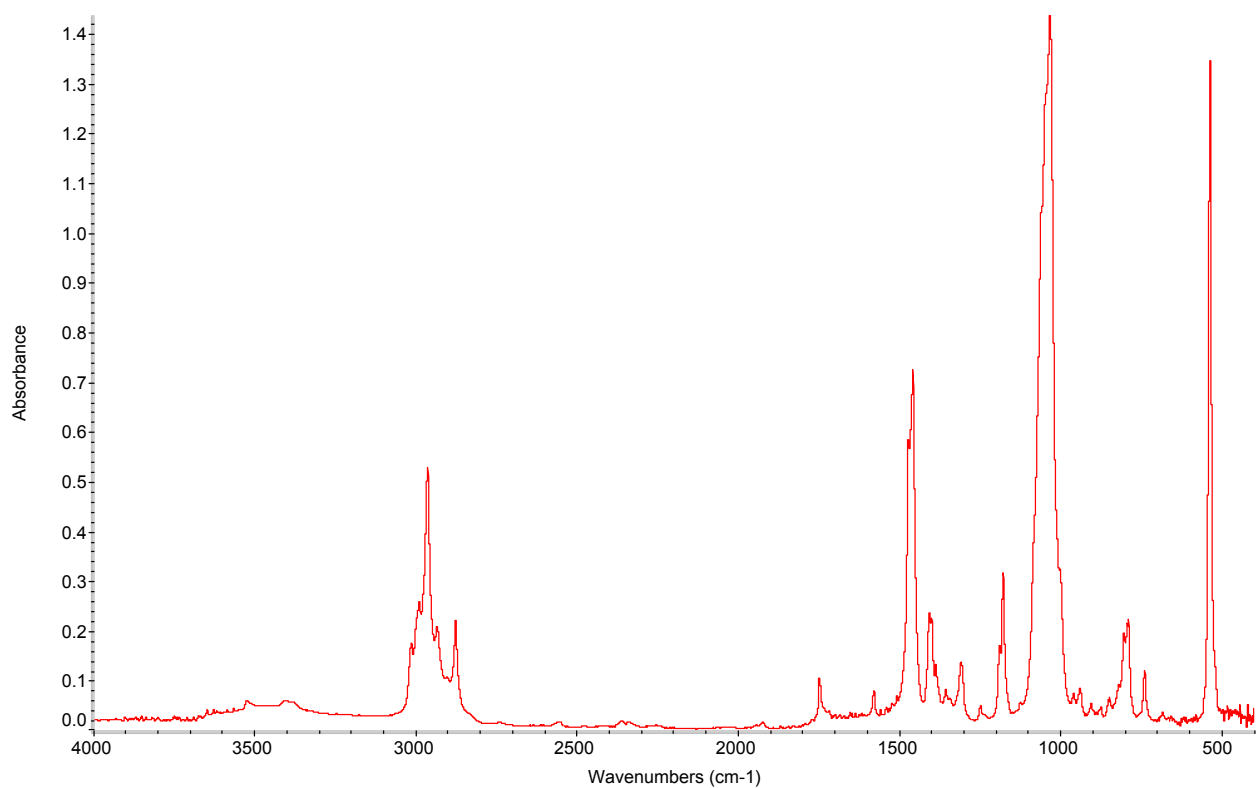

**Fig. S.14** FT-IR spectrum of [N<sub>2.2.2.4</sub>]<sub>2</sub>[B<sub>12</sub>Cl<sub>12</sub>].

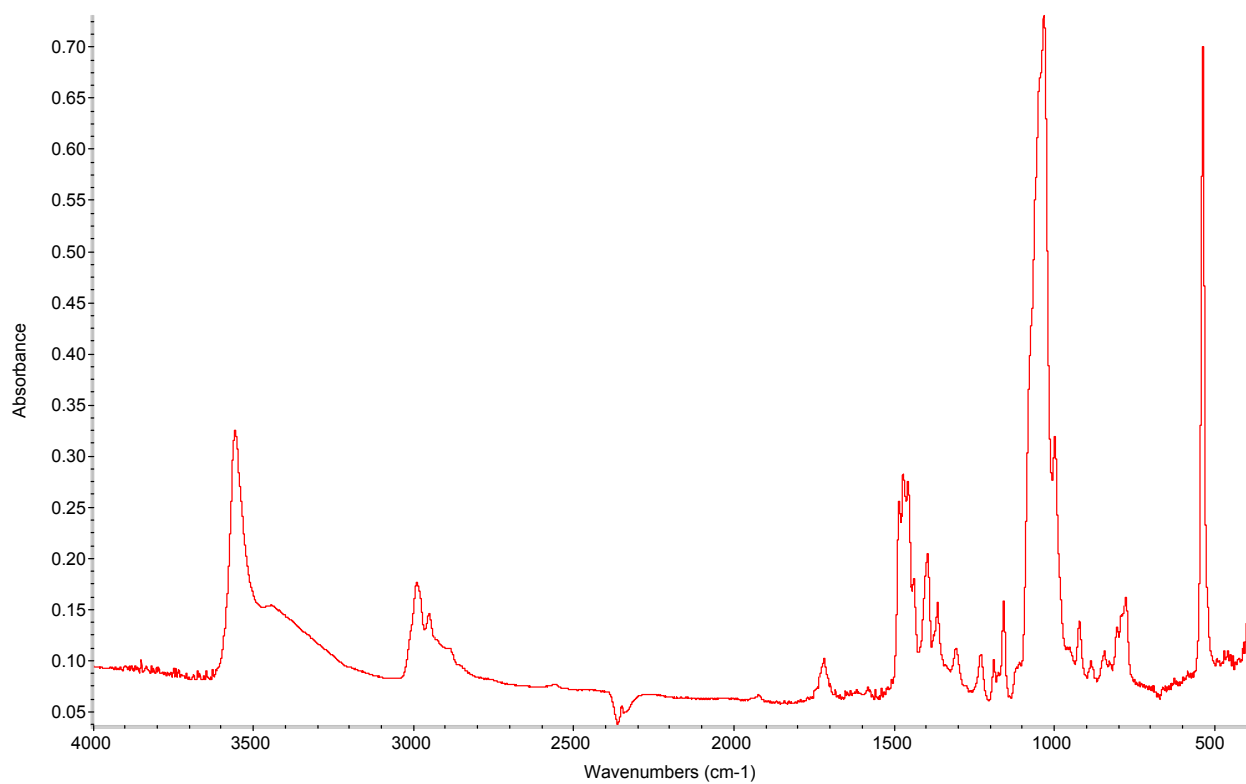

**Fig. S.15** FT-IR spectrum of [N<sub>2.2.2</sub>HE]<sub>2</sub>[B<sub>12</sub>Cl<sub>12</sub>].

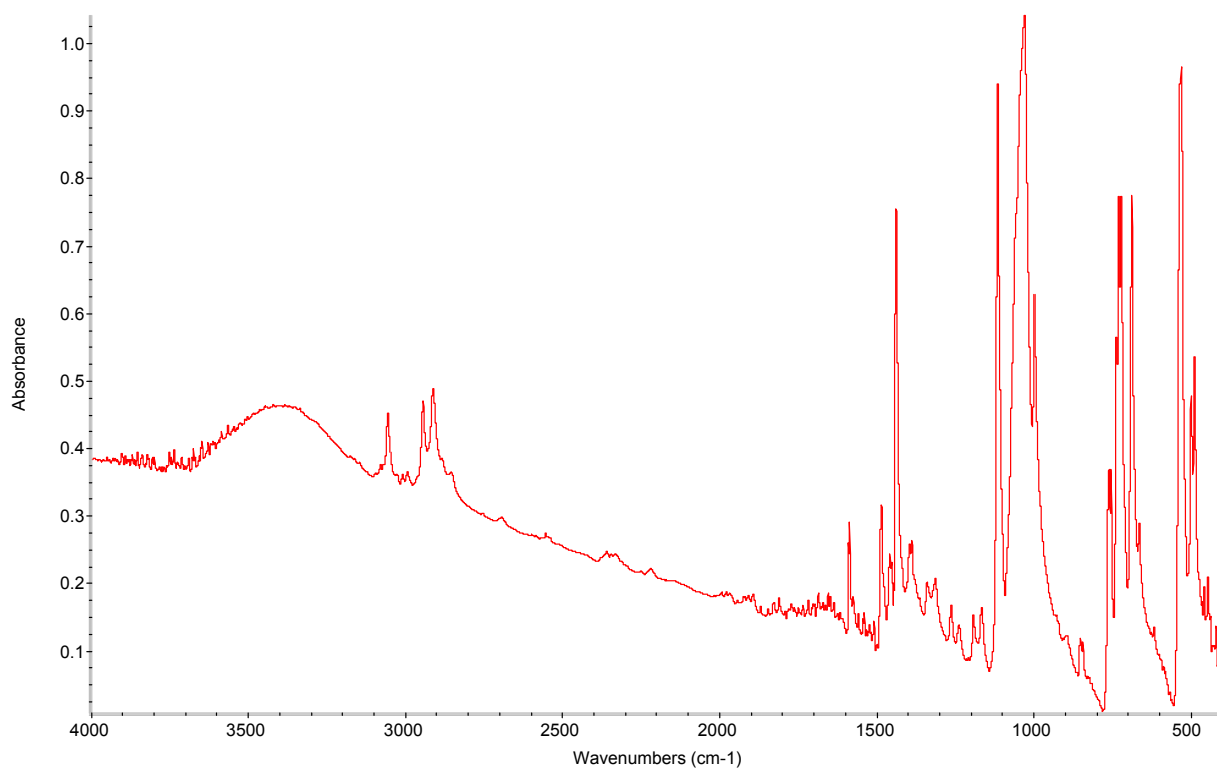

**Fig. S.16** FT-IR spectrum of [P P P P 2][B<sub>12</sub>Cl<sub>12</sub>].



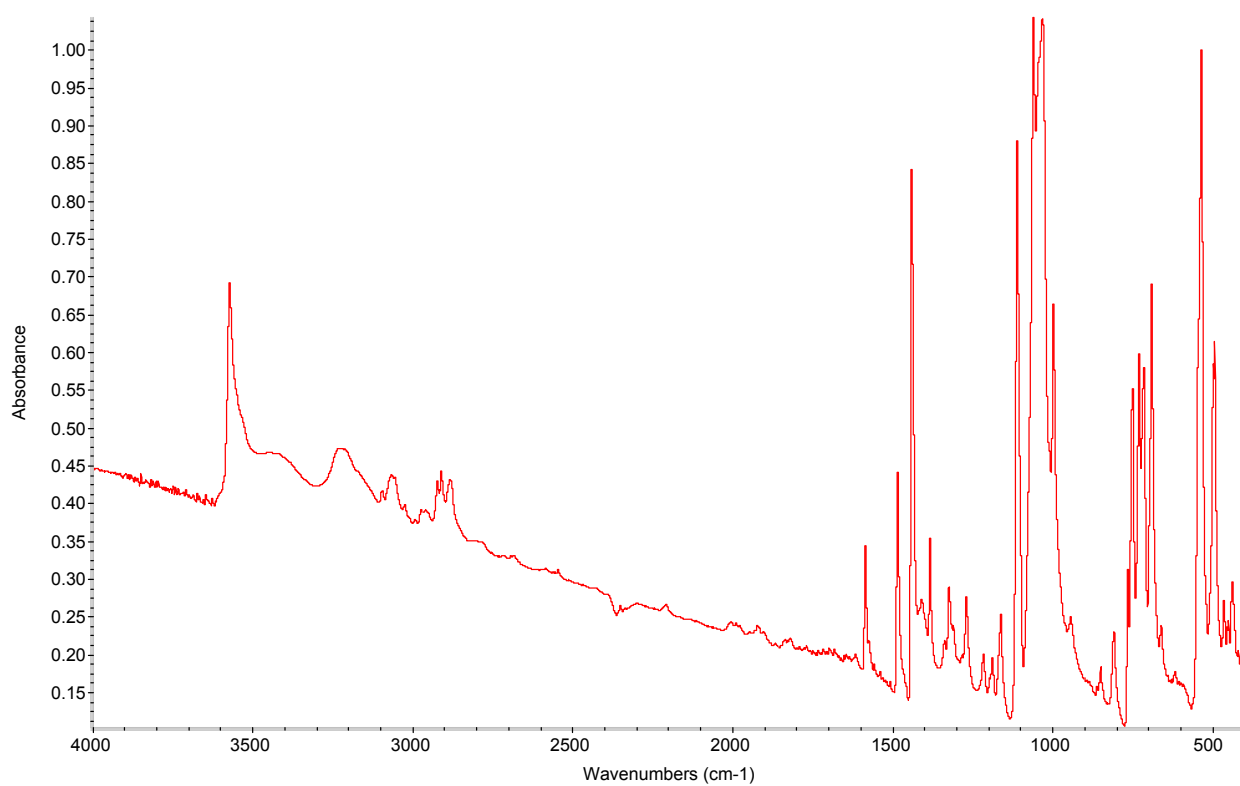

**Fig. S.17** FT-IR spectrum of [P P P HE]<sub>2</sub>[B<sub>12</sub>Cl<sub>12</sub>].

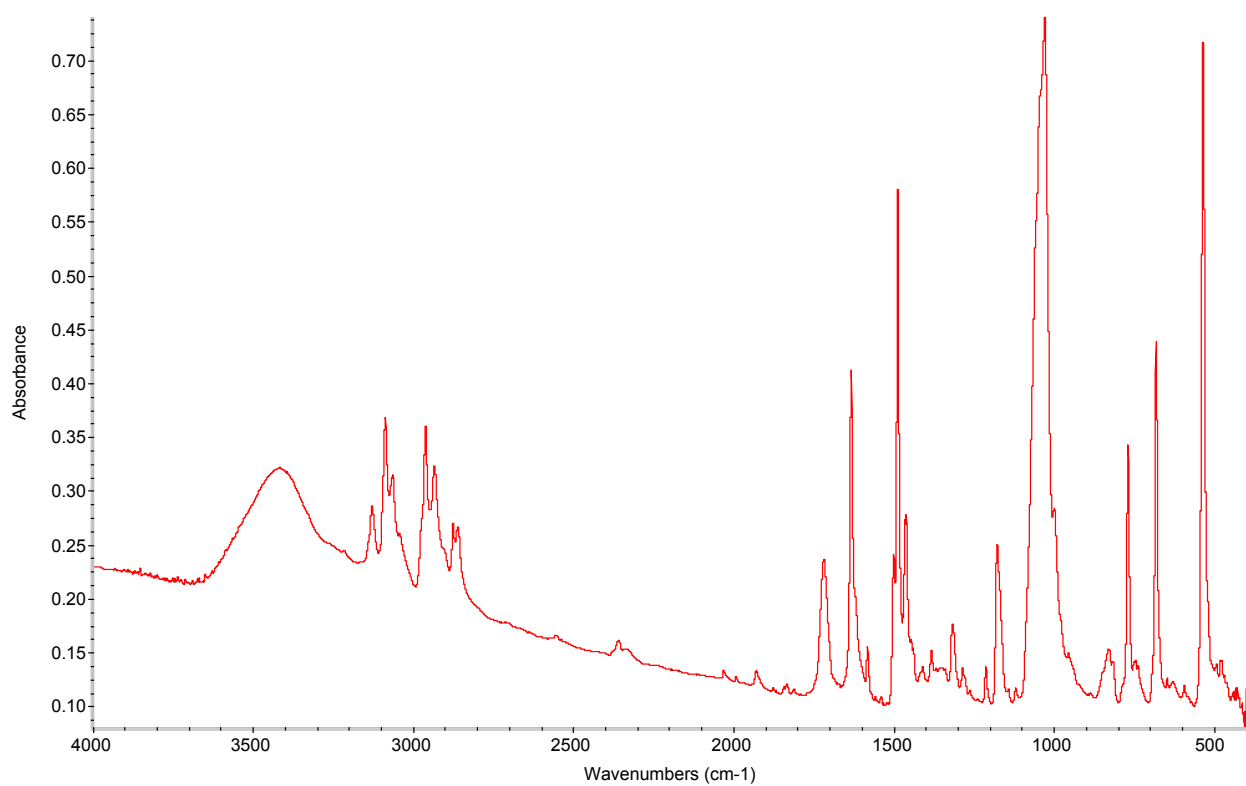

**Fig. S.18** FT-IR spectrum of [PyC<sub>4</sub>]<sub>2</sub>[B<sub>12</sub>Cl<sub>12</sub>].
